# Supplementary material for: Towards a Quantitative Mechanistic Understanding of Localized Pulmonary Tissue Retention—A Combined In Vivo/In Silico Approach Based on Four Model Drugs
Source: Pharmaceutics. 2020 Apr 29;12(5):408. doi: 10.3390/pharmaceutics12050408 (PMC7284631; doi:10.3390/pharmaceutics12050408)
Supplement: Supplementary file 1 [file pharmaceutics-12-00408-s001.zip › Supplementary_material_2.pdf]

```

test(){
  deriv(A1 = - C1 * C - C12 * (C - C2))
  deriv(A2 = C12 * (C - C2))

  deriv(Parenchyma = QP * (C - 1/KPP*CP))
  deriv(Bronchi     = QB * (C - 1/KPB*CB))
  deriv(Trachea     = QT * (C - 1/KPT*CT))

  dosepoint(A1)

  C = A1 / V
  C2 = A2 / V2

  Parenchyma_weight = 0.004      # kg parenchyme /kg bodyweight
  (assumption: 80% of total lung)
  Bronchi_weight     = 0.0008     # kg parenchyme /kg bodyweight
  (assumption: 20% of total lung - Trachea based on sample)
  Trachea_weight     = 0.0002     # Based on sample in the respective
  studies

  CP = Parenchyma / Parenchyma_weight # concentration in the alveolar
  parenchyma
  CB = Bronchi / Bronchi_weight        # concentration in the bronchi
  CT = Trachea / Trachea_weight        # concentration in the trachea

  error(CEps = 0.1)                   # residual variability plasma
  error(CEps_t = 0.1)                 # residual variability tissue

  observe(CObs = C * (1 + CEps))

  ## Error model
  observe(CObs_P = CP * (1 + CEps_t))
  observe(CObs_B = CB * (1 + CEps_t))
  observe(CObs_T = CT * (1 + CEps_t))

  ## Define covariate -> Compound; 1=FP, 2=Linezolid, 3=Indomethacin,
  4=Salmeterol
  fcovariate(CPD())

  ## Define sytemic PK parameters
  stparm(V      = tvVfp*(CPD==1)  + tvVlin*(CPD==2)  + tvVind*(CPD==3)  +
tvVsal*(CPD==4))
  stparm(V2     = tvV2fp*(CPD==1) + tvV2lin*(CPD==2) + tvV2ind*(CPD==3) +
tvV2sal*(CPD==4))
  stparm(C1     = tvC1fp*(CPD==1) + tvC1lin*(CPD==2) + tvC1ind*(CPD==3) +
tvC1sal*(CPD==4))
  stparm(C12    = tvC12fp*(CPD==1) + tvC12lin*(CPD==2) + tvC12ind*(CPD==3) +
tvC12sal*(CPD==4))

  ## Define the lung partition coefficients
  stparm(KPP = tvKPPfp*(CPD==1) + tvKPPlin*(CPD==2) + tvKPPind*(CPD==3) +
tvKPPsal*(CPD==4)) # Kp of the alveolar parenchyma
  stparm(KPB = tvKPBfp*(CPD==1) + tvKPBlin*(CPD==2) + tvKPBind*(CPD==3) +
tvKPBsal*(CPD==4)) # Kp of the bronchi

```

```

    stparm(KPT = tvKPTfp*(CPD==1) + tvKPTlin*(CPD==2) + tvKPTind*(CPD==3) +
tvKPTsal*(CPD==4)) # Kp of the trachea

    ## Define the perfusion rates
    stparm(QP = tvQP * (Ff_fp*(CPD==1) + Ff_lin*(CPD==2) + Ff_ind*(CPD==3) +
Ff_sal*(CPD==4))) # alveolar blood flow
    stparm(QB = tvQB * (Ff_fp*(CPD==1) + Ff_lin*(CPD==2) + Ff_ind*(CPD==3) +
Ff_sal*(CPD==4))) # bronchial blood flow
    stparm(QT = tvQT * (Ff_fp*(CPD==1) + Ff_lin*(CPD==2) + Ff_ind*(CPD==3) +
Ff_sal*(CPD==4))) # tracheal blood flow

    fixef(tvQP = c(0, 21, ))
    fixef(tvQB = c(0, 2, ))
    fixef(tvQT = c(0, 0.5, ))

## Initial compound-specific values
# fluticasone propionate
    Ff_fp = 0.0153    # fraction unbound in plasma

    fixef(tvKPPfp = c(0, 6, ))
    fixef(tvKPBfp = c(0, 6, ))
    fixef(tvKPTfp = c(0, 6, ))

    fixef(tvVfp(freeze) = c(0, 0.223336, ))
    fixef(tvV2fp(freeze) = c(0, 2.40999, ))
    fixef(tvClfp(freeze) = c(0, 3.37369, ))
    fixef(tvCl2fp(freeze) = c(0, 4.71991, ))

# linezolid
    Ff_lin = 0.732    # fraction unbound in plasma

    fixef(tvKPPlin = c(0, 0.9, ))
    fixef(tvKPBlin = c(0, 0.6, ))
    fixef(tvKPTlin = c(0, 0.5, ))

    fixef(tvVlin(freeze) = c(0, 0.32044, ))
    fixef(tvV2lin(freeze) = c(0, 0.627917, ))
    fixef(tvCl1lin(freeze) = c(0, 0.279411, ))
    fixef(tvCl2lin(freeze) = c(0, 2.79208, ))

# indomethacin
    Ff_ind = 0.024    # fraction unbound in plasma

    fixef(tvKPPind = c(0, 0.3, ))
    fixef(tvKPBind = c(0, 0.3, ))
    fixef(tvKPTind = c(0, 0.3, ))

    fixef(tvVind(freeze) = c(0, 0.153778, ))
    fixef(tvV2ind(freeze) = c(0, 1, ))
    fixef(tvClind(freeze) = c(0, 0.0691472, ))
    fixef(tvCl2ind(freeze) = c(, 0, ))

# salmeterol
    Ff_sal = 0.0139    # fraction unbound in plasma

```

```
fixef(tvKPPsal = c(0, 45, ))  
fixef(tvKPBsal = c(0, 20, ))  
fixef(tvKPTsal = c(0, 7, ))
```

```
fixef(tvVsal(freeze) = c(0, 0.12328, ))  
fixef(tvV2sal(freeze) = c(0, 3.76907, ))  
fixef(tvClsal(freeze) = c(0, 3.86488, ))  
fixef(tvCl2sal(freeze) = c(0, 3.24267, ))
```

```
}
```
