# Supplementary material for: Towards a Quantitative Mechanistic Understanding of Localized Pulmonary Tissue Retention—A Combined In Vivo/In Silico Approach Based on Four Model Drugs
Source: Pharmaceutics. 2020 Apr 29;12(5):408. doi: 10.3390/pharmaceutics12050408 (PMC7284631; doi:10.3390/pharmaceutics12050408)
Supplement: Supplementary file 1 [file pharmaceutics-12-00408-s001.zip › Supplementary_material_TableS4.pdf]

**Table S4.** Study design and sample weights.

| Drug                                | Study | Bodyweight (BW) |     |   | Dose<br>(mg/kg/h) | Infusion          |                   | Sampling time points (min) |                    | Mean sample weights (g) |       |                |       |                |       |                   |      |                  |      |
|-------------------------------------|-------|-----------------|-----|---|-------------------|-------------------|-------------------|----------------------------|--------------------|-------------------------|-------|----------------|-------|----------------|-------|-------------------|------|------------------|------|
|                                     |       | mean<br>(g)     | %CV | N |                   | duration<br>(min) | rate<br>(mL/kg/h) | tissue<br>(min)            | plasma<br>(min)    | lung<br>(g)             | %CV   | trachea<br>(g) | %CV   | bronchi<br>(g) | %CV   | parenchyma<br>(g) | %CV  | rest lung<br>(g) | %CV  |
| Salmeterol <sup>1</sup>             |       |                 |     |   |                   |                   |                   |                            |                    |                         |       |                |       |                |       |                   |      |                  |      |
|                                     | 1A    | 252             | 2.6 | 2 | 2                 | 15                | 10                | 15                         | 5, 15              | 1.13                    | 5.05  | 0.0477         | 15.5  | 0.133          | 7.99  | 0.0493            | 21.6 | 0.590            | 16.4 |
|                                     | 1B    | 264             | 3.0 | 3 | 2                 | 45                | 10                | 45                         | ", 30, 45          | 1.17                    | 0.70  | 0.0420         | 7.01  | 0.130          | 12.0  | 0.0527            | 29.7 | 0.627            | 2.11 |
|                                     | 1C    | 257             | 1.8 | 3 | 2                 | 60                | 10                | 120                        | ", 60, 120         | 1.18                    | 3.44  | 0.0533         | 0.884 | 0.151          | 8.19  | 0.0523            | 23.7 | 0.633            | 8.93 |
|                                     | 1D    | 251             | 2.6 | 3 | 2                 | 60                | 10                | 240                        | ", 240             | 1.14                    | 4.96  | 0.0490         | 18.6  | 0.127          | 16.0  | 0.0530            | 38.3 | 0.648            | 10.2 |
| Fluticasone Propionate <sup>1</sup> |       |                 |     |   |                   |                   |                   |                            |                    |                         |       |                |       |                |       |                   |      |                  |      |
|                                     | 2A    | 321             | 3.0 | 2 | 2                 | 15                | 10                | 15                         | 5, 15              | 1.50                    | 0.739 | 0.0647         | 19.1  | 0.167          | 25.79 | 0.109             | 39.6 | 0.744            | 14.1 |
|                                     | 2B    | 329             | 6.7 | 3 | 2                 | 45                | 10                | 45                         | ", 30, 45          | 1.53                    | 9.87  | 0.0687         | 5.36  | 0.194          | 9.67  | 0.131             | 14.3 | 0.604            | 30.5 |
|                                     | 2C    | 332             | 5.6 | 3 | 2                 | 60                | 10                | 120                        | ", 60, 70, 90, 120 | 1.48                    | 1.80  | 0.0703         | 8.15  | 0.159          | 9.80  | 0.0717            | 21.7 | 0.759            | 11.4 |
|                                     | 2D    | 297             | 2.7 | 3 | 2                 | 60                | 10                | 240                        | ", 180, 240        | 1.32                    | 2.07  | 0.0660         | 21.4  | 0.125          | 67.9  | 0.186             | 45.7 | 0.492            | 31.9 |
| Linezolid                           |       |                 |     |   |                   |                   |                   |                            |                    |                         |       |                |       |                |       |                   |      |                  |      |
|                                     | 3A    | 280             | 3.9 | 3 | 4                 | 15                | 10                | 15                         | 5, 15              | 1.20                    | 2.97  | 0.0540         | 12.1  | 0.123          | 19.5  | 0.0730            | 32.8 | 0.640            | 10.2 |
|                                     | 3B    | 280             | 1.9 | 3 | 4                 | 45                | 10                | 45                         | ", 30, 45          | 1.33                    | 1.50  | 0.0470         | 4.60  | 0.139          | 33.9  | 0.101             | 46.7 | 0.637            | 10.2 |
|                                     | 3C    | 280             | 1.2 | 3 | 4                 | 60                | 10                | 120                        | ", 60, 70, 90, 120 | 1.25                    | 9.00  | 0.0400         | 7.36  | 0.143          | 34.7  | 0.0640            | 77.6 | 0.598            | 14.0 |
|                                     | 3D    | 279             | 2.5 | 3 | 4                 | 60                | 10                | 240                        | ", 240             | 1.30                    | 10.4  | 0.0483         | 32.7  | 0.132          | 27.3  | 0.104             | 34.7 | 0.606            | 26.6 |
| Indomethacin                        |       |                 |     |   |                   |                   |                   |                            |                    |                         |       |                |       |                |       |                   |      |                  |      |
|                                     | 4A    | 250             | 1.1 | 3 | 0.5               | 15                | 10                | 15                         | 5, 15              | 1.10                    | 0.197 | 0.0423         | 34.6  | 0.0960         | 11.4  | 0.0387            | 11.6 | 0.495            | 14.1 |
|                                     | 4B    | 277             | 1.8 | 3 | 0.5               | 45                | 10                | 45                         | ", 30, 45          | 1.36                    | 6.50  | 0.0480         | 2.95  | 0.150          | 11.9  | 0.119             | 55.8 | 0.720            | 8.60 |
|                                     | 4C    | 290             | 3.7 | 3 | 0.5               | 60                | 10                | 120                        | ", 60, 70, 90, 120 | 1.30                    | 10.1  | 0.0443         | 26.1  | 0.149          | 3.56  | 0.0600            | 40.3 | 0.786            | 17.7 |
|                                     | 4D    | 259             | 5.2 | 3 | 0.5               | 60                | 10                | 240                        | ", 240             | 1.30                    | 18.0  | 0.0413         | 8.91  | 0.118          | 18.5  | 0.112             | 46.7 | 0.660            | 12.0 |
| Total                               | mean  | 281             |     |   |                   |                   |                   |                            |                    | 1.29                    |       | 0.0517         |       | 0.140          |       | 0.0860            |      | 0.640            |      |
|                                     | %CV   | 9.3             |     |   |                   |                   |                   |                            |                    | 12.5                    |       | 25.5           |       | 20.6           |       | 63.9              |      | 20.4             |      |

<sup>1</sup>For both salmeterol and fluticasone propionate, results from one rat designated for tissue sampling after 0.25 h had to be excluded due to para-venous administration.
